# Supplementary material
Source: MDPI journal article supplement (https://www.mdpi.com/2073-4395/13/5/1221)
Supplement: s1 [file s1]

## Article

# Effects of Marine Residue-Derived Fertilizers on Strawberry Growth, Nutrient Content, Fruit Yield and Quality

Ailin Moloșag <sup>1</sup>, Oana Cristina Pârvulescu <sup>2,\*</sup>, Violeta Alexandra Ion <sup>1,\*</sup>, Adrian Constantin Asănică <sup>1</sup>, Raluca Soane <sup>1</sup>, Andrei Moț <sup>1</sup>, Aurora Dobrin <sup>1</sup>, Mihai Frîncu <sup>1</sup>, Anne-Kristin Løes <sup>3</sup>, Joshua Cabell <sup>3</sup>, Athanasios Salifoglou <sup>4</sup>, Marios Maroulis <sup>4</sup>, Sevasti Matsia <sup>4</sup>, Oana Crina Bujor <sup>1</sup>, Diana Egri <sup>2</sup>, Tănase Dobre <sup>2</sup>, Liliana Aurelia Bădulescu <sup>1</sup> and Viorica Lagunovschi-Luchian <sup>1</sup>

- <sup>1</sup> Research Center for Studies of Food and Agricultural Products Quality, University of Agronomic Sciences and Veterinary Medicine of Bucharest, 59 Marasti Blvd., 011464 Bucharest, Romania; ailin.molosag.01@gmail.com (A.M.); asanica@gmail.com (A.C.A.); ralucasoane@gmail.com (R.S.); andrei.mot@qlab.usamv.ro (A.M.); aurora.dobrin@qlab.usamv.ro (A.D.); mihai.frincu@qlab.usamv.ro (M.F.); oana.bujor@qlab.usamv.ro (O.C.B.); liliana.badulescu@qlab.usamv.ro (L.A.B.); vluchian@hotmail.com (V.L.L.)
- <sup>2</sup> Chemical and Biochemical Engineering Department, University POLITEHNICA of Bucharest, 1-7 Gheorghe Polizu Str., 011061 Bucharest, Romania; diana\_egri@yahoo.com (D.E.); tghdobre@gmail.com (T.D.)
- <sup>3</sup> Norwegian Centre for Organic Agriculture, Gunnarsveg 6, NO-6630 Tingvoll, Norway; anne-kristin.loes@norsok.no (A.K.L.); joshua.cabell@norsok.no (J.C.)
- <sup>4</sup> School of Chemical Engineering, Aristotle University of Thessaloniki, Corner of September 3rd and Egnatia St., 54124 Thessaloniki, Greece; salif@auth.gr (A.S.); info@modernanalytics.gr (M.M.); sevi.matsia@hotmail.com (S.M.)
- \* Correspondence: oana.parvulescu@yahoo.com (O.C.P.); violeta.ion.phd@gmail.com (V.A.I.)

## Supplementary material

**Table S1.** Mean values of mass percentages of nutrients in chemical fertilizers.

| Fertilizer         | N   | P | K  | S  | Mg | B   | Cu   | Fe  | Mo   | Mn   | Zn   | HS |
|--------------------|-----|---|----|----|----|-----|------|-----|------|------|------|----|
| Terrenova          | 0.8 | 5 | 10 | 0  | 0  | 0   | 0    | 0   | 0    | 0    | 0    | 16 |
| Raiza Mix          | 1.9 | 0 | 0  | 0  | 0  | 0.2 | 0.1  | 1.1 | 0.02 | 0.5  | 0.2  | 0  |
| Naturmix- Mg       | 0   | 0 | 0  | 0  | 4  | 0.3 | 0.25 | 2.5 | 0.1  | 1.5  | 0.35 | 0  |
| KSC II PHYT-ACTYL  | 23  | 5 | 5  | 29 | 0  | 0   | 0    | 0.1 | 0    | 0.05 | 0.1  | 0  |
| KSC III PHYT-ACTYL | 15  | 5 | 35 | 0  | 0  | 0.1 | 0    | 0.1 | 0.01 | 0    | 0    | 0  |

(N) nitrogen; (P) phosphorus; (K) potassium; (S) sulfur; (Mg) magnesium; (B) boron; (Cu) copper; (Fe) iron; (Mo) molybdenum; (Mn) manganese; (Zn) zinc; (HS) humic substances.

**Table S2.** Mean values of physicochemical properties of peat substrate.

|                                       |      |
|---------------------------------------|------|
| Moisture (%)                          | 58   |
| Dry bulk density (kg/m <sup>3</sup> ) | 75   |
| pH                                    | 5.9  |
| Electrical conductivity (mS/m)        | 32   |
| Organic matter (%)                    | 90   |
| Soluble nitrogen (%)                  | 0.21 |
| Soluble phosphorus (%)                | 0.06 |
| Soluble potassium (%)                 | 0.19 |

**Table S3.** Nutrient inputs per plant during the experiment.

| Nutrient | Units    | F1   | F2   | FA   | E    |
|----------|----------|------|------|------|------|
| N        | g/plant  | 5.50 | 5.39 | 5.41 | 2.55 |
| P        | g/plant  | 2.38 | 4.91 | 3.32 | 0.68 |
| K        | g/plant  | 0.37 | 0.52 | 0.55 | 2.79 |
| Ca       | g/plant  | 5.31 | 11.8 | 7.93 | -    |
| Na       | g/plant  | 0.77 | 1.00 | 1.02 | -    |
| Mg       | g/plant  | 0.16 | 0.24 | 0.17 | 0.03 |
| Fe       | mg/plant | 4.50 | 4.86 | 11.0 | 21.6 |
| Mn       | mg/plant | 0.08 | 0.22 | 1.07 | 7.78 |
| Zn       | mg/plant | 2.09 | 2.96 | 2.85 | 7.73 |

(N) nitrogen; (P) phosphorus; (K) potassium; (Ca) calcium; (Na) sodium; (Mg) magnesium; (Fe) iron; (Mn) manganese; (Zn) zinc; (F1) cod bone powder; (F2) common ling bone powder; (FA) fish and algae pellets; (E) chemical fertilizers.
